# Supplementary material for: Associating Biological Activity and Predicted Structure of Antimicrobial Peptides from Amphibians and Insects
Source: MDPI journal article supplement (doi:10.3390/antibiotics11121710), 2022-11-27
Supplement: s1 [file s1]

Supplementary material for:

## **Associating biological activity and predicted structure of antimicrobial peptides from amphibians and insects**

Amelia Richter, Darcy Sutherland, Hossein Ebrahimikondori, Alana Babcock, Nathan Louie, Chenkai Li, Lauren Coombe, Diana Lin, René L. Warren, Anat Yanai, Monica Kotkoff, Caren C. Helbing, Fraser Hof, Linda M.N. Hoang, Inanc Birol

### **Additional File 1**

### **Table of Contents**

|                                                                                                                       |           |
|-----------------------------------------------------------------------------------------------------------------------|-----------|
| <b>Table S1. Minimum inhibitory concentrations of peptides from three independent experiments.....</b>                | <b>2</b>  |
| <b>Table S2. Highest Scoring BLASTp matches of validated mature AMPs to NCBI non-redundant protein database .....</b> | <b>5</b>  |
| <b>Table S3. Range of selectivity indices of the 51 bioactive AMPs .....</b>                                          | <b>8</b>  |
| <b>Figure S1. Superimposed predicted 3D structures of AMP family members.....</b>                                     | <b>10</b> |

## Supplementary Tables

Table S1. Minimum inhibitory concentrations of peptides from three independent experiments

| Peptide                        |       | MIC (μg/mL)               |                               |                             |
|--------------------------------|-------|---------------------------|-------------------------------|-----------------------------|
|                                |       | <i>E. coli</i> ATCC 25922 | <i>Salmonella</i> Enteritidis | <i>S. aureus</i> ATCC 29213 |
| GILDTLKQLGKAAVQGLLSKAACKLAKTC  | AmMa1 | 2-4                       | 16-32                         | 8                           |
| DNKWQNVHFHRSVAVTGPTSFSFSHK     | AnF11 | >128                      | >128                          | >128                        |
| GILRSLGWIQMPRSRRRHR            | AnF12 | 16-32                     | 128                           | >128                        |
| GIYTGRLLPVYIPQPRPPHRLRR        | ApCe1 | 4-8                       | 16-32                         | >128                        |
| VKCRVRR                        | ApMe1 | >128                      | >128                          | >128                        |
| GAHKEVFKRDTALTKEAAKKAKK        | ApMe2 | >128                      | >128                          | >128                        |
| GWGLINIKIPPVLHKVSVPLVSKR       | ApMe3 | >128                      | >128                          | >128                        |
| KHHHIKLRHERHRRYILKSLI          | ApMe4 | >128                      | >128                          | >128                        |
| SILSTLSHKR                     | ApMe5 | >128                      | >128                          | >128                        |
| RARKIRRRRGSLRHCVTIPSTPSGR      | ApMe6 | >128                      | >128                          | >128                        |
| AAGAGKVTKSAQKAQKAK             | BoAr1 | >128                      | >128                          | >128                        |
| ATAAECLKHPWLKIKK               | BoAr2 | >128                      | >128                          | >128                        |
| IIRATAAECLKHPWLKIKK            | BoAr3 | >128                      | >128                          | >128                        |
| SVASLAKNSAWPVSLKR              | BoAr4 | >128                      | >128                          | >128                        |
| VTISIARRVSSHKRG                | BoAr5 | >128                      | >128                          | >128                        |
| GILRLVTRRRFRSPTNLNRYTVARLVSGVP | BoAr6 | 32                        | 64                            | 64-128                      |
| NKIKFINKYVKKVQLKKILVKS         | BoCo1 | >128                      | >128                          | >128                        |
| RKIIAVSVHKLRCRVKR              | BoUs1 | 64-128                    | 64                            | >128                        |
| FACPIGFFRLKR                   | CaCa1 | 128                       | >128                          | >128                        |
| FIKTQVLKHLVAGVRVARGLDWKWR      | CaCa2 | 8                         | >128                          | 64-128                      |
| KHHHIKLRHGRHRRSVLRTL           | CaCa3 | >128                      | >128                          | >128                        |
| RRFFATAPCGYSRKFKITRRKR         | CaCa4 | 16-32                     | 32-64                         | >128                        |
| GAFVLWGPTPRRRR                 | DiLo1 | 128                       | >128                          | >128                        |
| GIFSLIKGAAK                    | LeBo1 | >128                      | >128                          | >128                        |
| GWLDIAKKVASVVAGIVKR            | LiVe1 | 4-8                       | 32                            | 16-32                       |
| GWLDIAKKVASVVAGLGKR            | LiVe2 | 4-8                       | 64-128                        | 64                          |
| VMLPKFKR                       | MiDe1 | >128                      | >128                          | >128                        |
| RRAIFASIRGYLGRLKR              | MyGu1 | 4                         | 8-16                          | 128                         |
| TPLSDIFRGQLRSRVSR              | NaVi1 | >128                      | >128                          | >128                        |
| SSLSPSSSSGLGKKKKRKSKRASR       | NaVi2 | >128                      | >128                          | >128                        |

|                                |        |        |        |        |
|--------------------------------|--------|--------|--------|--------|
| KLFLTLWKLKR                    | NaVi3  | 8-16   | 64     | 128    |
| GSSSRSCRCIRLSRLSSKRT           | NaVi4  | >128   | >128   | >128   |
| GLLSGILGAGKKIVCGFSGLC          | OdMa1  | 8-16   | 128    | 64     |
| GLISGILGAGKKVLCGLSGLC          | OdMa10 | 16-32  | >128   | 64-128 |
| GFMDTAKNVAKNVAVTLLYNLKCKITKAC  | OdMa12 | 4      | 64     | 64-128 |
| GFMDTAKNVAKNVAVTLLDNLKCKITKAC  | OdMa13 | 64-128 | >128   | >128   |
| GLLRGILGAGKKIVCGLSGLC          | OdMa2  | 4      | 8-16   | 4-8    |
| GLLSGLLGAGKKIVCGLSGMC          | OdMa3  | 8-16   | 64     | 32     |
| GILSGLLGAGKKIVC                | OdMa4  | 8-16   | 32     | >128   |
| GILSGLLGAGKKIVCGLSGLC          | OdMa5  | 8-16   | 64-128 | 8-16   |
| GLLSGVLGVGKKIVCGLSGLC          | OdMa6  | 8-16   | 128    | 16-32  |
| GLLSGVLGVGKKVLCGLSGLC          | OdMa7  | 8-16   | 128    | 16-32  |
| GLISGILGAGKK                   | OdMa8  | >128   | >128   | >128   |
| GLISGILGAGKKVLC                | OdMa9  | 64-128 | 128    | >128   |
| GILSGLLGAGKKLACGLIGLC          | OdTo1  | 8      | 32-64  | 8-16   |
| GIFGGHLKVGKKIACGLSGLC          | OdTo2  | 32     | >128   | >128   |
| GIFGGLLKEGKKIACGLSGLC          | OdTo3  | 32     | >128   | >128   |
| KLMIPRKKRGIFGGLLKVGKKIACGLSGLC | OdTo4  | 8-16   | 16     | 16     |
| RPRPQQVPPRPPHRLRR              | PaVa1  | 2-4    | 4-8    | >128   |
| KYHHIKLRHGRHRTIH               | PaVa2  | >128   | >128   | >128   |
| ITEPVGTKAPTFTSELRGGWLKKR       | PaVa3  | >128   | >128   | >128   |
| WALRWKTR                       | PaVi1  | >128   | >128   | >128   |
| GLLGKVLGVGKKVLCGVTGLC          | PeNi1  | 4      | 8-16   | 4      |
| GLLDVTVGAAKNVAGILLNKLKCKVTGDC  | PeNi10 | 8      | 64-128 | 16-32  |
| GILDTLKGAAKNVAGVLLDKLKCKITGGC  | PeNi11 | 8-16   | 128    | 64     |
| GAPKGCWTKSYPPKPCSGKR           | PeNi12 | >128   | >128   | >128   |
| KEERGAPKGCWTKSYPPKPCSGKR       | PeNi13 | >128   | >128   | >128   |
| GLWTTIKEGVKNFSVGVLDKIRCKITGGC  | PeNi14 | 4-8    | 32     | 16-32  |
| FLPSSPWNEGTYVLKKLKS            | PeNi15 | >128   | >128   | >128   |
| ATAWKVPPGLQPIRPIRPLCGNDKS      | PeNi16 | >128   | >128   | >128   |
| RMIRPPGFSPFRVAPASSLKR          | PeNi17 | >128   | >128   | >128   |
| RPRWSHRSRR                     | PeNi18 | >128   | >128   | >128   |
| GLLGKVLGVGKKVLCVVSGLC          | PeNi2  | 4      | 16-32  | 4      |
| GIFSLIKGAAKVVAKGLG             | PeNi3  | 16-32  | 64-128 | 64-128 |
| GLLGKVLGVGKKVLC                | PeNi4  | 8-16   | 4-8    | 4-8    |
| GLLGKVLGVGKKVLCGVTGRERCQ       | PeNi5  | 32     | 64     | >128   |
| AGLQFPVGRIHRHLKTR              | PeNi6  | >128   | >128   | >128   |
| VIPFVASVAAEMMHVYCAASKRCKN      | PeNi7  | 128    | >128   | >128   |
| GILLNTLKGAAKNVAGVLLDKLKCKITGGC | PeNi8  | 8      | 64     | 4-8    |

|                                |        |        |       |        |
|--------------------------------|--------|--------|-------|--------|
| GLLGKILGVGKKVLCGVSGLC          | PeNi9  | 2-4    | 8-16  | 4-8    |
| VAAFAIIGCLCCRRPRR              | PoRo1  | >128   | >128  | >128   |
| ISIKEALEHSFFHTVPRKWCKKH        | PoSn1  | 64     | >128  | >128   |
| TALKSLILKKLAKLNM               | PoSn2  | 64-128 | >128  | >128   |
| FLPVVAGLAACKVLPISIICAVTKKC     | RaCa15 | 8-16   | >128  | 4-8    |
| GLLSGILGAGKK                   | RaOm1  | >128   | >128  | >128   |
| GILSGLLGAGKKIVCGLSGMC          | RaOm2  | 64-128 | >128  | >128   |
| GIFSLIKGAACKVVAKGLGK           | RaOm3  | 8-16   | 32-64 | 64     |
| GLLGKVLGVGKKVLCGVSGRC          | RaOm4  | 4-8    | 32    | 64-128 |
| AGYSRMIRPPGFSFPRVAPASSLKR      | RaOm5  | >128   | >128  | >128   |
| GLVGKLVKGGLKLIGHVANG           | RaSi1  | 8-16   | >128  | 64-128 |
| FPPPFGR                        | RaSi2  | >128   | >128  | >128   |
| EEQRFLPVVAGLAACKVLPISIICAVTKKC | RaSy2  | 64     | >128  | 64-128 |
| KIKIPWGKVKDFLVGGMKAVGKK        | TeBi1  | 1-2    | 4-8   | 4-8    |
| VPFGLKPR                       | TeRu1  | >128   | >128  | >128   |
| AFVRILCYCCPRRIKRR              | TeRu2  | 64-128 | >128  | 128    |
| AVLSFVHKLFNLFLHVDTSKGKCRATLQ   | TeRu3  | >128   | >128  | >128   |
| SWLSKSVKLVNKKNYTRLEKLAKKKLFNE  | TeRu4  | 1      | 2-4   | >128   |
| FILHAKKTRSAK                   | VeSi1  | >128   | >128  | >128   |

**Table S2.** Highest Scoring BLASTp matches of validated mature AMPs to NCBI non-redundant protein database

| Peptide |                                                                                                                                                                          |                | BLASTp Results                                              |                              |            |                  |
|---------|--------------------------------------------------------------------------------------------------------------------------------------------------------------------------|----------------|-------------------------------------------------------------|------------------------------|------------|------------------|
| ID      | Source Organism                                                                                                                                                          | Accession      | Label                                                       | Organism                     | % Identity | % Query Coverage |
| AmMa1   | <i>Amolops mantzorum</i>                                                                                                                                                 | ADM34231.1     | palustrin-2GN3 antimicrobial peptide precursor              | <i>Amolops granulosis</i>    | 93         | 100              |
| AnFl2   | <i>Anterhynchium flavomarginatum</i>                                                                                                                                     | NA             |                                                             |                              |            |                  |
| ApCe1   | <i>Apis cerana</i>                                                                                                                                                       | NA             |                                                             |                              |            |                  |
| BoAr6   | <i>Bombus ardens</i>                                                                                                                                                     | NA             |                                                             |                              |            |                  |
| BoUs1   | <i>Bombus ussuriensis</i>                                                                                                                                                | NA             |                                                             |                              |            |                  |
| CaCa1   | <i>Camponotus castaneus</i> , <i>Odontomachus monticola</i> , <i>Polistes rothneyi</i> , <i>Polistes snelleni</i> , <i>Sphecidae</i> sp. KJ-8906, <i>Vespa dybowskii</i> | XP_044595060.1 | uncharacterized protein LOC123272390                        | <i>Cotesia glomerata</i>     | 100        | 100              |
| CaCa2   | <i>Camponotus castaneus</i> , <i>Odontomachus monticola</i> , <i>Temnothorax rugatulus</i>                                                                               | XP_032682614.1 | E3 ubiquitin-protein ligase HECTD1 isoform X1               | <i>Odontomachus brunneus</i> | 100        | 100              |
| CaCa4   | <i>Camponotus castaneus</i>                                                                                                                                              | XP_012226981.1 | PREDICTED: F-box/LRR-repeat protein 20 isoform X1           | <i>Linepithema humile</i>    | 95         | 92               |
| DiLo    | <i>Diachasmimorpha longicaudata</i>                                                                                                                                      | XP_008546965.1 | PREDICTED: ubiquitin carboxyl-terminal hydrolase 30 homolog | <i>Microplitis demolitor</i> | 93         | 100              |
| LiVe1   | <i>Litoria verreauxii</i>                                                                                                                                                | NA             |                                                             |                              |            |                  |
| LiVe2   | <i>Litoria verreauxii</i>                                                                                                                                                | NA             |                                                             |                              |            |                  |
| MyGu1   | <i>Myrmecia gulosa</i>                                                                                                                                                   | NA             |                                                             |                              |            |                  |
| NaVi3   | <i>Nasonia vitripennis</i> x <i>Nasonia giraulti</i> F1                                                                                                                  | NA             |                                                             |                              |            |                  |
| OdMa1   | <i>Odorrana margaretae</i>                                                                                                                                               | AWH66435.1     | nigrocin-HL precursor                                       | <i>Hylarana latouchii</i>    | 95         | 100              |
| OdMa2   | <i>Odorrana margaretae</i>                                                                                                                                               | ABG76398.1     | nigrosin-OG15 antimicrobial peptide precursor               | <i>Odorrana grahami</i>      | 95         | 100              |
| OdMa3   | <i>Odorrana margaretae</i>                                                                                                                                               | AWH66435.1     | nigrocin-HL precursor                                       | <i>Hylarana latouchii</i>    | 90         | 100              |
| OdMa4   | <i>Odorrana margaretae</i>                                                                                                                                               | NA             |                                                             |                              |            |                  |
| OdMa5   | <i>Odorrana margaretae</i>                                                                                                                                               | ACA81697.1     | lividin-7b precursor                                        | <i>Odorrana livida</i>       | 100        | 100              |
| OdMa6   | <i>Odorrana margaretae</i>                                                                                                                                               | ADP05878.1     | nigrosin-RA3 peptide precursor                              | <i>Odorrana andersonii</i>   | 100        | 100              |
| OdMa7   | <i>Odorrana margaretae</i>                                                                                                                                               | ABG76389.1     | nigrosin-OG21 antimicrobial peptide precursor               | <i>Odorrana grahami</i>      | 100        | 100              |
| OdMa9   | <i>Odorrana margaretae</i>                                                                                                                                               | NA             |                                                             |                              |            |                  |
| OdMa10  | <i>Odorrana margaretae</i>                                                                                                                                               | ADM34194.1     | nigrosin-MG1 antimicrobial peptide precursor                | <i>Odorrana margaretae</i>   | 100        | 100              |
| OdMa12  | <i>Odorrana margaretae</i>                                                                                                                                               | ABG76517.1     | odorrain-F2 antimicrobial peptide precursor                 | <i>Odorrana grahami</i>      | 97         | 100              |
| OdMa13  | <i>Odorrana margaretae</i>                                                                                                                                               | ABG76517.1     | odorrain-F2 antimicrobial peptide precursor                 | <i>Odorrana grahami</i>      | 100        | 100              |
| OdTo1   | <i>Odorrana tormota</i>                                                                                                                                                  | ADE48808.1     | nigrosin-SHa antimicrobial protein                          | <i>Odorrana schmackeri</i>   | 81         | 100              |

|        |                                                                                                                                                                    |                |                                                                       |                                  |     |     |
|--------|--------------------------------------------------------------------------------------------------------------------------------------------------------------------|----------------|-----------------------------------------------------------------------|----------------------------------|-----|-----|
| OdTo2  | <i>Odorrana tormota</i>                                                                                                                                            | AIU99961.1     | nigrosin-2EV4                                                         | <i>Odorrana exiliversabilis</i>  | 71  | 100 |
| OdTo3  | <i>Odorrana tormota</i>                                                                                                                                            | AIU99958.1     | nigrosin-2EV1                                                         | <i>Odorrana exiliversabilis</i>  | 76  | 100 |
| OdTo4  | <i>Odorrana tormota</i>                                                                                                                                            | AIU99958.1     | nigrosin-2EV1                                                         | <i>Odorrana exiliversabilis</i>  | 78  | 77  |
| PaVa1  | <i>Partula varia</i>                                                                                                                                               | XP_024940855.1 | apidaecins type 14-like isoform X2                                    | <i>Cephus cinctus</i>            | 100 | 100 |
| PeNi1  | <i>Pelophylax nigromaculatus</i>                                                                                                                                   | AEM68196.1     | nigrocin-2N protein precursor, partial                                | <i>Pelophylax nigromaculatus</i> | 95  | 100 |
| PeNi2  | <i>Pelophylax nigromaculatus</i>                                                                                                                                   | AEM68196.1     | nigrocin-2N protein precursor, partial                                | <i>Pelophylax nigromaculatus</i> | 95  | 100 |
| PeNi3  | <i>Pelophylax nigromaculatus</i>                                                                                                                                   | AEM68180.1     | esculentin-2N protein precursor, partial                              | <i>Pelophylax nigromaculatus</i> | 100 | 100 |
| PeNi4  | <i>Pelophylax nigromaculatus</i>                                                                                                                                   | NA             |                                                                       |                                  |     |     |
| PeNi5  | <i>Pelophylax nigromaculatus</i>                                                                                                                                   | AEM68196.1     | nigrocin-2N protein precursor, partial                                | <i>Pelophylax nigromaculatus</i> | 95  | 79  |
| PeNi7  | <i>Bufo gargarizans, Leptobrachium boringii, Megophrys sangzhiensis, Polypedates megacephalus, Pelophylax nigromaculatus, Rhacophorus dennysi, Rana omeimontis</i> | AEM68212.1     | nigrocin-6N protein precursor, partial                                | <i>Pelophylax nigromaculatus</i> | 100 | 100 |
| PeNi8  | <i>Bufo gargarizans, Megophrys sangzhiensis, Polypedates megacephalus, Pelophylax nigromaculatus, Rhacophorus dennysi, Rana omeimontis</i>                         | AGE10575.1     | pelophylaxin-2                                                        | <i>Pelophylax nigromaculatus</i> | 100 | 100 |
| PeNi9  | <i>Leptobrachium boringii, Megophrys sangzhiensis, Polypedates megacephalus, Pelophylax nigromaculatus, Rhacophorus dennysi, Rana omeimontis</i>                   | AEM68196.1     | nigrocin-2N protein precursor, partial                                | <i>Pelophylax nigromaculatus</i> | 95  | 100 |
| PeNi10 | <i>Leptobrachium boringii, Polypedates megacephalus, Pelophylax nigromaculatus, Rhacophorus dennysi, Rana omeimontis</i>                                           | AEM68233.1     | ranatuerin-2N protein precursor, partial                              | <i>Pelophylax nigromaculatus</i> | 100 | 100 |
| PeNi11 | <i>Leptobrachium boringii, Polypedates megacephalus, Pelophylax nigromaculatus, Rhacophorus dennysi, Rana omeimontis</i>                                           | AIU99901.1     | pelophylaxin-1 antimicrobial peptide precursor                        | <i>Pelophylax hubeiensis</i>     | 100 | 100 |
| PeNi14 | <i>Bufo gargarizans, Polypedates megacephalus, Pelophylax nigromaculatus, Rana omeimontis</i>                                                                      | AIU99897.1     | palustrin-2HB1                                                        | <i>Pelophylax hubeiensis</i>     | 86  | 100 |
| PoSn1  | <i>Polistes snelleni</i>                                                                                                                                           | EFN63611.1     | Phosphorylase b kinase gamma catalytic chain, skeletal muscle isoform | <i>Camponotus floridanus</i>     | 93  | 65  |
| PoSn2  | <i>Polistes snelleni</i>                                                                                                                                           | NA             |                                                                       |                                  |     |     |
| RaCa15 | <i>Rana catesbeiana</i>                                                                                                                                            | P82871.1       | RccName: Full=Brevinin-1SY                                            | <i>Lithobates sylvaticus</i>     | 100 | 100 |
| RaOm2  | <i>Rana omeimontis</i>                                                                                                                                             | ADE48808.1     | nigrosin-SHa antimicrobial protein                                    | <i>Odorrana schmackeri</i>       | 90  | 100 |
| RaOm3  | <i>Rana omeimontis</i>                                                                                                                                             | AEM68180.1     | esculentin-2N protein precursor, partial                              | <i>Pelophylax nigromaculatus</i> | 100 | 100 |

|       |                                                                                         |                |                                                      |                                  |     |     |
|-------|-----------------------------------------------------------------------------------------|----------------|------------------------------------------------------|----------------------------------|-----|-----|
| RaOm4 | <i>Rana omeimontis</i>                                                                  | AEM68196.1     | nigrocin-2N protein precursor, partial               | <i>Pelophylax nigromaculatus</i> | 95  | 100 |
| RaSi1 | <i>Allobates femoralis</i> , <i>Pristimantis toftae</i> ,<br><i>Ranitomeya sirensis</i> | NA             |                                                      |                                  |     |     |
| RaSy2 | <i>Rana sylvatica</i>                                                                   | ABK91541.1     | brevinin-1CHb precursor, partial                     | <i>Lithobates chiricahuensis</i> | 78  | 96  |
| TeBi1 | <i>Tetramorium bicarinatum</i>                                                          | W8GNV3.1       | Full=M-myrmecitoxin(01)-Tb1a; Short=M-MYRTX(01)-Tb1a | <i>Tetramorium bicarinatum</i>   | 100 | 100 |
| TeRu2 | <i>Temnothorax rugatulus</i>                                                            | XP_020294524.1 | dopamine receptor 2 isoform X1                       | <i>Pseudomyrmex gracilis</i>     | 94  | 100 |
| TeRu4 | <i>Temnothorax rugatulus</i>                                                            | XP_024884948.1 | uncharacterized protein LOC112463023                 | <i>Temnothorax curvispinosus</i> | 97  | 100 |

**Table S3.** Range of selectivity indices of the 51 bioactive AMPs

| AMP    | Selectivity Index         |                               |                             |
|--------|---------------------------|-------------------------------|-----------------------------|
|        | <i>E. coli</i> ATCC 25922 | <i>Salmonella</i> Enteritidis | <i>S. aureus</i> ATCC 29213 |
| AmMa1  | 32 - >64                  | ≥16                           | 4 - >8                      |
| AnFl2  | >4 - >8                   | N/O*                          | >1                          |
| ApCe1  | >16 - >32                 | N/O                           | >4 - >8                     |
| BoAr6  | >4                        | >1 - >2                       | >2                          |
| BoUs1  | >1 - >2                   | N/O                           | >2                          |
| CaCa1  | >1                        | N/O                           | N/O                         |
| CaCa2  | >16                       | >1 - >2                       | N/O                         |
| CaCa4  | >4 - >8                   | N/O                           | >2 - >4                     |
| DiLo1  | >1                        | N/O                           | N/O                         |
| LiVe1  | >16 - >32                 | >4 - >8                       | >4                          |
| LiVe2  | >16 - >32                 | >2                            | >1 - >2                     |
| MyGu1  | >32                       | >1                            | >8 - >16                    |
| NaVi3  | >8 - >16                  | >1                            | >2                          |
| OdMa1  | >8 - >16                  | >2 - >4                       | >1                          |
| OdMa2  | 32                        | 16 - 32                       | 8 - 16                      |
| OdMa3  | >8 - >16                  | >4                            | >2                          |
| OdMa4  | >8 - >16                  | N/O                           | >4                          |
| OdMa5  | 8 - 16                    | 8 - 16                        | 1 - 2                       |
| OdMa6  | >8 - >16                  | >4 - >8                       | >1                          |
| OdMa7  | >8 - >16                  | >4 - >8                       | >1                          |
| OdMa9  | >1 - >2                   | N/O                           | >1                          |
| OdMa10 | >4                        | >1 - >2                       | N/O                         |
| OdMa12 | 32                        | >1 - >2                       | >2                          |
| OdMa13 | >1 - >2                   | N/O                           | N/O                         |
| OdTo1  | ≥16                       | 8 - >16                       | 2 - >4                      |
| OdTo2  | >4                        | N/O                           | N/O                         |
| OdTo3  | >2 - >4                   | N/O                           | N/O                         |
| OdTo4  | >8 - >16                  | >8                            | >8                          |
| PaVa1  | >32 - >64                 | N/O                           | >16 - >32                   |
| PeNi1  | ≥32                       | ≥32                           | 8 - >16                     |
| PeNi2  | >32                       | >32                           | >4 - >8                     |
| PeNi3  | >4 - >8                   | >1 - >2                       | >1 - >2                     |
| PeNi4  | >8 - >16                  | >16 - >32                     | >16 - >32                   |
| PeNi5  | >4                        | N/O                           | >2                          |
| PeNi7  | >1                        | N/O                           | N/O                         |
| PeNi8  | >16                       | >16 - >32                     | >2                          |



|        |            |           |           |
|--------|------------|-----------|-----------|
| PeNi9  | 32 - >64   | 16 - >32  | 8 - >16   |
| PeNi10 | >16        | >4 - >8   | >1 - >2   |
| PeNi11 | >8 - >16   | >2 - >4   | >1        |
| PeNi14 | >16 - >32  | >4 - >8   | >4        |
| PoSn1  | >2         | N/O       | N/O       |
| PoSn2  | >1 - >2    | N/O       | N/O       |
| RaCa15 | 4 - 16     | 8 - 32    | N/O       |
| RaOm2  | >1 - >2    | N/O       | N/O       |
| RaOm3  | >8 - >16   | >2        | >2 - >4   |
| RaOm4  | >16 - >32  | >1 - >2   | >4        |
| RaSi1  | >8 - >16   | >1 - >2   | N/O       |
| RaSy2  | >2         | >1 - >2   | N/O       |
| TeBi1  | >64 - >128 | >16 - >32 | >16 - >32 |
| TeRu2  | >1 - >2    | N/O       | N/O       |
| TeRu4  | >128       | N/O       | >32 - >64 |

\*N/O indicates no observed antimicrobial activity against the given bacterial species

## Supplementary Figures

**Apidaecin (2)**

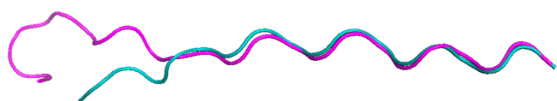

**Brevinin-2 (7)**

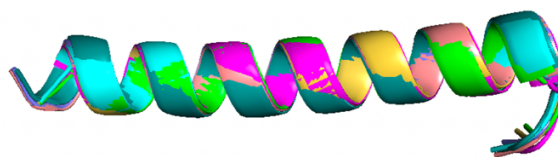

**Brevinin-1 (3)**

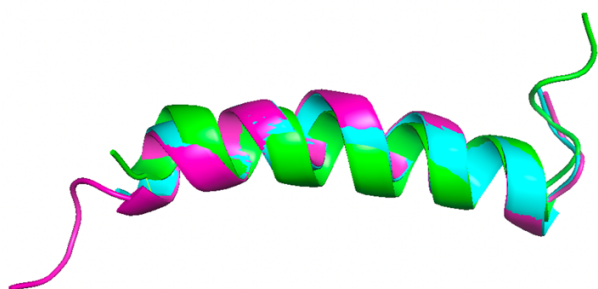

**Nigrocin-2 (18)**

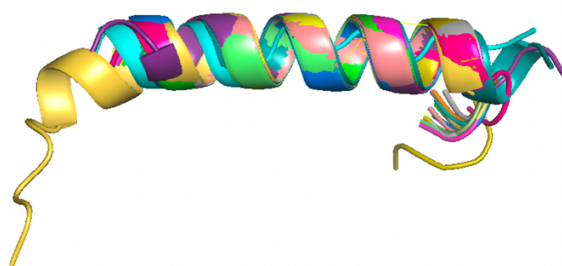

**Figure S1. Superimposed predicted 3D structures of AMP family members.** Peptides identified as belonging to the Apidaecin, Brevinin-1, Brevinin-2 and Nigrocin-2 peptides within the 51 bioactive peptides are depicted.
